# Supplementary material for: Structural diversity of the mixed-ligand system Mn-cpdba-2,2′-bpy controlled by temperature
Source: Royal Society of Chemistry journal article supplement (doi:10.1039/c0ce00297f), 2010-11-25
Supplement: c0ce00297f.pdf [file c0ce00297f.pdf]

## Supporting materials

### Structural Diversity of the Mixed-Ligand System Mn-cpdba-2,2'-bpy Controlled by Temperature

Jian-Ke Sun, Wei Li, Li-Xuan Cai, Jie Zhang\*

State Key Laboratory of Structural Chemistry, Fujian Institute of Research on the Structure of Matter, and Graduate School of the Chinese Academy of Sciences, Fuzhou, Fujian 350002, P. R. China, E-mail: [zhangjie@fjirsm.ac.cn](mailto:zhangjie@fjirsm.ac.cn).

\*\*\*\*\*

**Table S1.** Selected bond lengths (Å) and angles (deg) for **1**.

|                     |            |                   |            |
|---------------------|------------|-------------------|------------|
| Mn(1)–O(4)#1        | 2.0772(16) | Mn(1)–O(3)#2      | 2.1131(15) |
| Mn(1)–O(1)          | 2.1822(15) | Mn(1)–N(2)        | 2.2429(18) |
| Mn(1)–N(1)          | 2.2755(18) | Mn(1)–O(2)        | 2.3910(16) |
| O(4)#1–Mn(1)–O(3)#2 | 96.79(7)   | O(4)#1–Mn(1)–O(1) | 90.56(7)   |
| O(3)#2–Mn(1)–O(1)   | 111.30(6)  | O(4)#1–Mn(1)–N(2) | 106.08(8)  |
| O(3)#2–Mn(1)–N(2)   | 90.25(6)   | O(1)–Mn(1)–N(2)   | 151.24(7)  |
| O(4)#1–Mn(1)–N(1)   | 170.95(8)  | O(3)#2–Mn(1)–N(1) | 92.15(6)   |
| O(1)–Mn(1)–N(1)     | 87.46(7)   | N(2)–Mn(1)–N(1)   | 72.40(7)   |
| O(4)#1–Mn(1)–O(2)   | 80.49(7)   | O(3)#2–Mn(1)–O(2) | 168.26(6)  |
| O(1)–Mn(1)–O(2)     | 57.55(6)   | N(2)–Mn(1)–O(2)   | 101.48(6)  |
| N(1)–Mn(1)–O(2)     | 91.01(6)   |                   |            |

Symmetry codes: #1  $x+1, -y+1/2, z+1/2$ ; #2  $-x+1, y-1/2, -z+1/2$ .

**Table S2.** Selected bond lengths (Å) and angles (deg) for **2**.

|                     |           |                     |            |
|---------------------|-----------|---------------------|------------|
| Mn(1)–O(4)#1        | 2.150(3)  | Mn(1)–O(4)#2        | 2.150(3)   |
| Mn(1)–O(9)          | 2.152(3)  | Mn(1)–O(9)#3        | 2.152(3)   |
| Mn(1)–O(1)          | 2.234(3)  | Mn(1)–O(1)#3        | 2.234(3)   |
| Mn(2)–O(10)#3       | 2.081(3)  | Mn(2)–O(3)#1        | 2.166(3)   |
| Mn(2)–N(21)         | 2.221(4)  | Mn(2)–O(1)          | 2.242(3)   |
| Mn(2)–N(4)          | 2.249(4)  | Mn(2)–O(2)          | 2.423(4)   |
| Mn(3)–O(1W)         | 2.139(6)  | Mn(3)–O(12)         | 2.268(7)   |
| Mn(3)–O(2W)         | 2.295(10) | Mn(3)–O(12)#4       | 2.333(7)   |
| Mn(3)–O(8W)#5       | 2.359(10) | Mn(3)–O(1W)#4       | 2.416(6)   |
| O(4)#1–Mn(1)–O(4)#2 | 180.0(2)  | O(4)#1–Mn(1)–O(9)   | 92.71(15)  |
| O(4)#2–Mn(1)–O(9)   | 87.29(15) | O(4)#1–Mn(1)–O(9)#3 | 87.29(15)  |
| O(4)#2–Mn(1)–O(9)#3 | 92.71(15) | O(9)–Mn(1)–O(9)#3   | 180.00(18) |
| O(4)#1–Mn(1)–O(1)   | 83.48(13) | O(4)#2–Mn(1)–O(1)   | 96.52(13)  |

|                       |            |                       |            |
|-----------------------|------------|-----------------------|------------|
| O(9)-Mn(1)-O(1)       | 89.95(12)  | O(9)#3-Mn(1)-O(1)     | 90.05(12)  |
| O(4)#1-Mn(1)-O(1)#3   | 96.52(13)  | O(4)#2-Mn(1)-O(1)#3   | 83.48(13)  |
| O(9)-Mn(1)-O(1)#3     | 90.05(12)  | O(9)#3-Mn(1)-O(1)#3   | 89.95(12)  |
| O(1)-Mn(1)-O(1)#3     | 180.00(15) | O(10)#3-Mn(2)-O(3)#1  | 84.82(14)  |
| O(10)#3-Mn(2)-N(21)   | 102.29(15) | O(3)#1-Mn(2)-N(21)    | 90.57(15)  |
| O(10)#3-Mn(2)-O(1)    | 96.21(13)  | O(3)#1-Mn(2)-O(1)     | 118.33(13) |
| N(21)-Mn(2)-O(1)      | 147.02(13) | O(10)#3-Mn(2)-N(4)    | 173.56(15) |
| O(3)#1-Mn(2)-N(4)     | 99.80(14)  | N(21)-Mn(2)-N(4)      | 73.33(15)  |
| O(1)-Mn(2)-N(4)       | 85.59(13)  | O(10)#3-Mn(2)-O(2)    | 90.79(14)  |
| O(3)#1-Mn(2)-O(2)     | 172.24(14) | N(21)-Mn(2)-O(2)      | 96.62(14)  |
| O(1)-Mn(2)-O(2)       | 55.73(12)  | N(4)-Mn(2)-O(2)       | 85.11(15)  |
| O(1W)-Mn(3)-O(12)     | 81.0(2)    | O(1W)-Mn(3)-O(2W)     | 89.6(3)    |
| O(12)-Mn(3)-O(2W)     | 136.6(3)   | O(1W)-Mn(3)-O(12)#4   | 80.9(2)    |
| O(12)-Mn(3)-O(12)#4   | 126.11(18) | O(2W)-Mn(3)-O(12)#4   | 93.4(3)    |
| O(1W)-Mn(3)-O(8W)#5   | 134.3(3)   | O(12)-Mn(3)-O(8W)#5   | 88.1(3)    |
| O(2W)-Mn(3)-O(8W)#5   | 68.6(3)    | O(12)#4-Mn(3)-O(8W)#5 | 137.5(3)   |
| O(1W)-Mn(3)-O(1W)#4   | 125.92(16) | O(12)-Mn(3)-O(1W)#4   | 76.6(2)    |
| O(2W)-Mn(3)-O(1W)#4   | 138.2(3)   | O(12)#4-Mn(3)-O(1W)#4 | 74.2(2)    |
| O(8W)#5-Mn(3)-O(1W)#4 | 93.6(3)    |                       |            |

Symmetry codes: #1  $x-1/2, -y+1/2, z-1/2$ ; #2  $-x+3/2, y+1/2, -z+1/2$ ; #3  $-x+1, -y+1, -z$ ; #4  $-x+1, -y, -z+1$ ; #5  $-x+3/2, y-1/2, -z+1/2$ .

**Table S3.** Selected bond lengths (Å) and angles (deg) for **4**.

|                     |            |                   |            |
|---------------------|------------|-------------------|------------|
| Mn(1)-O(8)#1        | 2.083(2)   | Mn(1)-O(2)        | 2.110(2)   |
| Mn(1)-O(7)#2        | 2.208(3)   | Mn(1)-O(1)#3      | 2.232(3)   |
| Mn(1)-N(4)          | 2.284(3)   | Mn(1)-N(5)        | 2.287(3)   |
| O(1)-Mn(1)#4        | 2.232(2)   | O(8)#1-Mn(1)-O(2) | 109.28(9)  |
| O(8)#1-Mn(1)-O(7)#2 | 88.68(10)  | O(2)-Mn(1)-O(7)#2 | 97.29(10)  |
| O(8)#1-Mn(1)-O(1)#3 | 101.65(11) | O(2)-Mn(1)-O(1)#3 | 88.59(10)  |
| O(7)#2-Mn(1)-O(1)#3 | 165.77(8)  | O(8)#1-Mn(1)-N(4) | 89.81(11)  |
| O(2)-Mn(1)-N(4)     | 160.70(10) | O(7)#2-Mn(1)-N(4) | 85.66(10)  |
| O(1)#3-Mn(1)-N(4)   | 84.62(10)  | O(8)#1-Mn(1)-N(5) | 161.27(10) |
| O(2)-Mn(1)-N(5)     | 89.18(10)  | O(7)#2-Mn(1)-N(5) | 85.75(10)  |
| O(1)#3-Mn(1)-N(5)   | 81.37(10)  | N(4)-Mn(1)-N(5)   | 71.96(10)  |

Symmetry codes: #1  $x, y+1, z$ ; #2  $-x+3/2, y+1, z-1/2$ ; #3  $-x+3/2, y, z+1/2$ .

**Table S4.** Selected bond lengths (Å) and angles (deg) for **5**.

|             |          |               |          |
|-------------|----------|---------------|----------|
| Mn(1)-O(33) | 2.088(2) | Mn(1)-O(3)#1  | 2.185(2) |
| Mn(1)-N(5)  | 2.220(3) | Mn(1)-N(4)    | 2.253(3) |
| Mn(1)-O(2)  | 2.263(2) | Mn(1)-O(1)    | 2.399(2) |
| Mn(2)-O(10) | 2.152(2) | Mn(2)-O(10)#2 | 2.152(2) |

|                       |            |                       |            |
|-----------------------|------------|-----------------------|------------|
| Mn(2)-0(4)#1          | 2.163(2)   | Mn(2)-0(4)#3          | 2.163(2)   |
| Mn(2)-0(2)            | 2.248(2)   | Mn(2)-0(2)#2          | 2.248(2)   |
| Mn(3)-0(17)           | 2.175(3)   | Mn(3)-0(5)            | 2.202(4)   |
| Mn(3)-0(11)           | 2.205(3)   | Mn(3)-0(9)            | 2.238(3)   |
| Mn(3)-N(9)            | 2.288(4)   | Mn(3)-N(10)           | 2.350(4)   |
| Mn(4)-0(27)#4         | 2.152(2)   | Mn(4)-0(27)#5         | 2.152(2)   |
| Mn(4)-0(19)#6         | 2.156(2)   | Mn(4)-0(19)           | 2.156(2)   |
| Mn(4)-0(25)           | 2.230(2)   | Mn(4)-0(25)#6         | 2.230(2)   |
| Mn(5)-0(20)           | 2.080(3)   | Mn(5)-0(28)#4         | 2.161(2)   |
| Mn(5)-N(15)           | 2.223(3)   | Mn(5)-0(25)#6         | 2.236(2)   |
| Mn(5)-N(14)           | 2.251(3)   | Mn(5)-0(26)#6         | 2.471(3)   |
| O(33)-Mn(1)-0(3)#1    | 84.88(10)  | O(33)-Mn(1)-N(5)      | 103.07(11) |
| O(3)#1-Mn(1)-N(5)     | 88.23(10)  | O(33)-Mn(1)-N(4)      | 173.58(11) |
| O(3)#1-Mn(1)-N(4)     | 100.33(10) | N(5)-Mn(1)-N(4)       | 73.55(12)  |
| O(33)-Mn(1)-0(2)      | 94.25(10)  | O(3)#1-Mn(1)-0(2)     | 121.46(9)  |
| N(5)-Mn(1)-0(2)       | 147.04(10) | N(4)-Mn(1)-0(2)       | 86.25(10)  |
| O(33)-Mn(1)-0(1)      | 91.74(10)  | O(3)#1-Mn(1)-0(1)     | 175.76(10) |
| N(5)-Mn(1)-0(1)       | 95.03(10)  | N(4)-Mn(1)-0(1)       | 83.22(10)  |
| O(2)-Mn(1)-0(1)       | 56.17(8)   | O(10)-Mn(2)-0(10)#2   | 180.00(13) |
| O(10)-Mn(2)-0(4)#1    | 86.64(10)  | O(10)#2-Mn(2)-0(4)#1  | 93.36(10)  |
| O(10)-Mn(2)-0(4)#3    | 93.36(10)  | O(10)#2-Mn(2)-0(4)#3  | 86.64(10)  |
| O(4)#1-Mn(2)-0(4)#3   | 180.000(1) | O(10)-Mn(2)-0(2)      | 90.45(9)   |
| O(10)#2-Mn(2)-0(2)    | 89.55(9)   | O(4)#1-Mn(2)-0(2)     | 82.59(9)   |
| O(4)#3-Mn(2)-0(2)     | 97.41(9)   | O(10)-Mn(2)-0(2)#2    | 89.55(9)   |
| O(10)#2-Mn(2)-0(2)#2  | 90.45(9)   | O(4)#1-Mn(2)-0(2)#2   | 97.41(9)   |
| O(4)#3-Mn(2)-0(2)#2   | 82.59(9)   | O(2)-Mn(2)-0(2)#2     | 180.00(9)  |
| O(17)-Mn(3)-0(5)      | 84.26(12)  | O(17)-Mn(3)-0(11)     | 141.14(13) |
| O(5)-Mn(3)-0(11)      | 80.40(12)  | O(17)-Mn(3)-0(9)      | 81.87(11)  |
| O(5)-Mn(3)-0(9)       | 135.75(15) | O(11)-Mn(3)-0(9)      | 84.68(12)  |
| O(17)-Mn(3)-N(9)      | 126.21(12) | O(5)-Mn(3)-N(9)       | 137.48(13) |
| O(11)-Mn(3)-N(9)      | 87.52(13)  | O(9)-Mn(3)-N(9)       | 82.55(14)  |
| O(17)-Mn(3)-N(10)     | 80.76(12)  | O(5)-Mn(3)-N(10)      | 90.87(14)  |
| O(11)-Mn(3)-N(10)     | 134.60(12) | O(9)-Mn(3)-N(10)      | 127.55(14) |
| N(9)-Mn(3)-N(10)      | 69.34(13)  | O(27)#4-Mn(4)-0(27)#5 | 180.00(15) |
| O(27)#4-Mn(4)-0(19)#6 | 92.41(10)  | O(27)#5-Mn(4)-0(19)#6 | 87.59(10)  |
| O(27)#4-Mn(4)-0(19)   | 87.59(10)  | O(27)#5-Mn(4)-0(19)   | 92.41(10)  |
| O(19)#6-Mn(4)-0(19)   | 180.00(12) | O(27)#4-Mn(4)-0(25)   | 95.25(9)   |
| O(27)#5-Mn(4)-0(25)   | 84.75(9)   | O(19)#6-Mn(4)-0(25)   | 89.49(9)   |
| O(19)-Mn(4)-0(25)     | 90.52(9)   | O(27)#4-Mn(4)-0(25)#6 | 84.75(9)   |
| O(27)#5-Mn(4)-0(25)#6 | 95.25(9)   | O(19)#6-Mn(4)-0(25)#6 | 90.51(9)   |
| O(19)-Mn(4)-0(25)#6   | 89.48(9)   | O(25)-Mn(4)-0(25)#6   | 180.00(6)  |
| O(20)-Mn(5)-0(28)#4   | 84.90(10)  | O(20)-Mn(5)-N(15)     | 101.19(11) |
| O(28)#4-Mn(5)-N(15)   | 92.96(10)  | O(20)-Mn(5)-0(25)#6   | 98.19(10)  |
| O(28)#4-Mn(5)-0(25)#6 | 115.68(9)  | N(15)-Mn(5)-0(25)#6   | 146.65(10) |

|                     |            |                       |            |
|---------------------|------------|-----------------------|------------|
| O(20)-Mn(5)-N(14)   | 173.06(11) | O(28)#4-Mn(5)-N(14)   | 99.10(10)  |
| N(15)-Mn(5)-N(14)   | 73.06(12)  | O(25)#6-Mn(5)-N(14)   | 85.24(10)  |
| O(20)-Mn(5)-O(26)#6 | 89.46(10)  | O(28)#5-Mn(5)-O(26)#6 | 168.21(10) |
| N(15)-Mn(5)-O(26)#6 | 98.29(10)  | O(25)#6-Mn(5)-O(26)#6 | 54.90(9)   |
| N(14)-Mn(5)-O(26)#6 | 87.60(11)  |                       |            |

Symmetry codes: #1  $x, -y+1/2, z-1/2$ ; #2  $-x+1, -y+1, -z+1$ ; #3  $-x+1, y+1/2, -z+3/2$ ; #4  $-x, -y+1/2, -z-1/2$ ; #5  $x, -y+5/2, z-1/2$ ; #6  $-x, -y+3, -z-1$ .

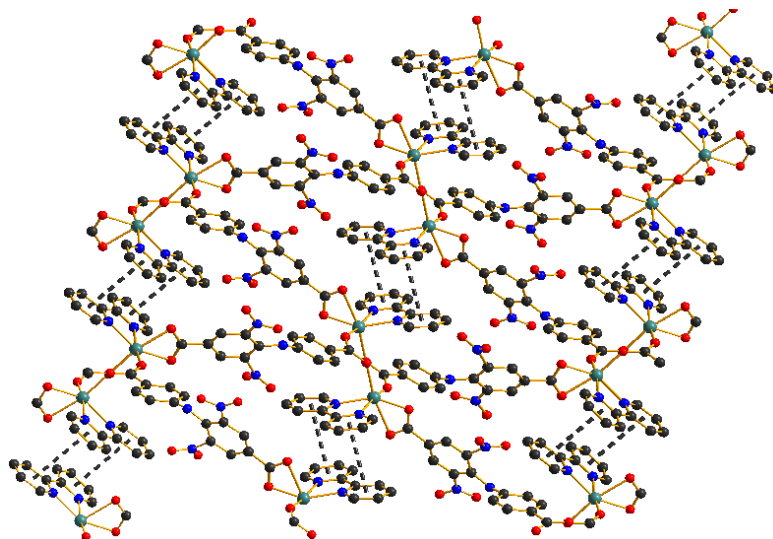

Fig S1. 3D supramolecular architecture of compound **1** with  $\pi$ - $\pi$  stacking interactions (dashed lines).

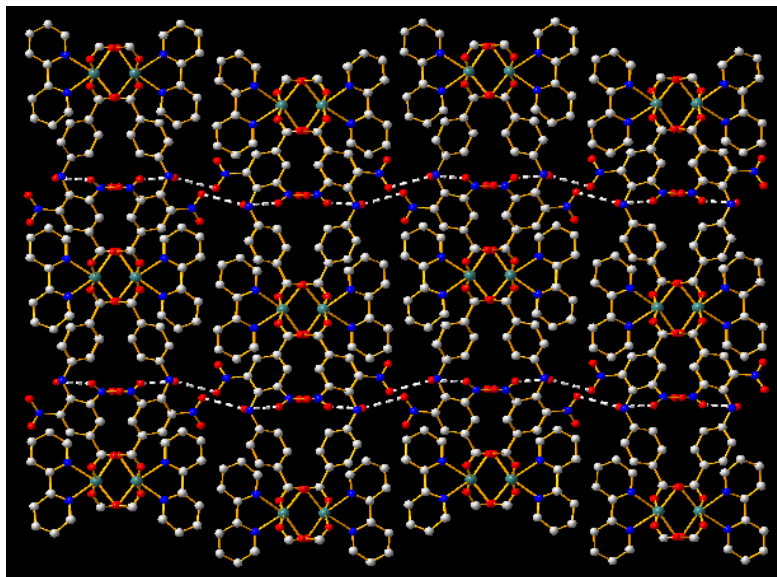

Fig S2. 3D supramolecular architecture of compound **4** with hydrogen bonds (dashed lines).
